# Supplementary material for: Role of "external facilitation" in implementation of research findings: a qualitative evaluation of facilitation experiences in the Veterans Health Administration
Source: PubMed Central journal article supplement (PMC1635058; doi:10.1186/1748-5908-1-23), 2006-10-18
Supplement: 1748-5908-1-23-S1.pdf [file 1748-5908-1-23-S1.pdf]

STUDY PROJECTS PER QUERI TEAM:  
GOALS AND RELATED IMPLEMENTATION INTERVENTIONS

|                                                                                                                                                                |                                                                                                                                                                                                                                                                                                                                                                             |
|----------------------------------------------------------------------------------------------------------------------------------------------------------------|-----------------------------------------------------------------------------------------------------------------------------------------------------------------------------------------------------------------------------------------------------------------------------------------------------------------------------------------------------------------------------|
| <p><b>SCI QUERI GOAL:</b><br/><i>Increase vaccination rates for influenza and pneumococcal pneumonia in veterans with spinal cord injury or disorders.</i></p> | <ul style="list-style-type: none"> <li>o Patient reminder letters with educational materials.</li> <li>o Practitioner education materials.</li> <li>o Computerized-clinical reminders.</li> <li>o Standing orders for administration of flu vaccine by nursing staff.</li> <li>o Feedback to sites once a year on staff and patient influenza vaccination rates.</li> </ul> |
|----------------------------------------------------------------------------------------------------------------------------------------------------------------|-----------------------------------------------------------------------------------------------------------------------------------------------------------------------------------------------------------------------------------------------------------------------------------------------------------------------------------------------------------------------------|

|                                                                                                                                                                      |                                                                                                                                                                                                                                                                                                                                                  |
|----------------------------------------------------------------------------------------------------------------------------------------------------------------------|--------------------------------------------------------------------------------------------------------------------------------------------------------------------------------------------------------------------------------------------------------------------------------------------------------------------------------------------------|
| <p><b>HIV QUERI GOAL:</b><br/><i>Implement and evaluate real-time computerized clinical reminders and a collaborative intensive quality improvement program.</i></p> | <ul style="list-style-type: none"> <li>o Real-time computerized clinical reminders.</li> <li>o A collaborative group-based quality improvement program, based on the Institute for Healthcare Improvement Breakthrough Series with modifications for this project.</li> <li>o Facility-level feedback regarding clinical performance.</li> </ul> |
|----------------------------------------------------------------------------------------------------------------------------------------------------------------------|--------------------------------------------------------------------------------------------------------------------------------------------------------------------------------------------------------------------------------------------------------------------------------------------------------------------------------------------------|

|                                                                                                       |                                                                                                                                                                                                                                                                                                                                                                                 |
|-------------------------------------------------------------------------------------------------------|---------------------------------------------------------------------------------------------------------------------------------------------------------------------------------------------------------------------------------------------------------------------------------------------------------------------------------------------------------------------------------|
| <p><b>IHD QUERI: GOAL:</b><br/><i>Reduce low density lipoprotein levels in patients with IHD.</i></p> | <ul style="list-style-type: none"> <li>o Optional choices for the sites:             <ul style="list-style-type: none"> <li>• Paper point-of-care reminders,</li> <li>• Lipid clinic,</li> <li>• Audit/feedback to clinician,</li> <li>• Patient-education component,</li> <li>• Electronic clinical reminder, and</li> <li>• Templated standing orders.</li> </ul> </li> </ul> |
|-------------------------------------------------------------------------------------------------------|---------------------------------------------------------------------------------------------------------------------------------------------------------------------------------------------------------------------------------------------------------------------------------------------------------------------------------------------------------------------------------|

|                                                                                                                                 |                                                                                                                                                                                                                                                                                                                                                     |
|---------------------------------------------------------------------------------------------------------------------------------|-----------------------------------------------------------------------------------------------------------------------------------------------------------------------------------------------------------------------------------------------------------------------------------------------------------------------------------------------------|
| <p><b>MENTAL HEALTH QUERI GOAL:</b><br/><i>Implement an evidence-based treatment model for patients with schizophrenia.</i></p> | <ul style="list-style-type: none"> <li>o Performance feedback.</li> <li>o Pocket cards.</li> <li>o Educational kick-off/training session for champions @ each site.</li> <li>o Opinion leaders (also known as local champions).</li> <li>o Clinical reminders/electronic.</li> <li>o CQI: encouraged initiation of quality improvements.</li> </ul> |
|---------------------------------------------------------------------------------------------------------------------------------|-----------------------------------------------------------------------------------------------------------------------------------------------------------------------------------------------------------------------------------------------------------------------------------------------------------------------------------------------------|

STUDY PROJECTS PER QUERI TEAM:  
GOALS AND RELATED IMPLEMENTATION INTERVENTIONS  
 (CONTINUED)

|                                                                                                                                                  |                                                                                                                                                                                                                                                                                                                                                                                                                                                                                                                                                                                                                                                                                               |
|--------------------------------------------------------------------------------------------------------------------------------------------------|-----------------------------------------------------------------------------------------------------------------------------------------------------------------------------------------------------------------------------------------------------------------------------------------------------------------------------------------------------------------------------------------------------------------------------------------------------------------------------------------------------------------------------------------------------------------------------------------------------------------------------------------------------------------------------------------------|
| <p>SUBSTANCE ABUSE<br/> <b>QUERI:</b><br/> <b>GOAL:</b><br/> <i>Improve concordance with four best-practices for opioid agonist therapy.</i></p> | <ul style="list-style-type: none"> <li>o 1.5 day educational site visit:           <ul style="list-style-type: none"> <li>• On evidence-based recommendations and QI process – PDSA, and</li> <li>• Note: Used visit to meet with leadership to learn more about baseline clinic functioning.</li> </ul> </li> <li>o Multiple educational and quality improvement tools:           <ul style="list-style-type: none"> <li>• Evidence summary for recommendations,</li> <li>• Dosing algorithm,</li> <li>• Sample contingency management plan, and</li> <li>• 14-item questionnaire for staff about attitudes.</li> </ul> </li> <li>o Monthly progress reports/audits and feedback.</li> </ul> |
|--------------------------------------------------------------------------------------------------------------------------------------------------|-----------------------------------------------------------------------------------------------------------------------------------------------------------------------------------------------------------------------------------------------------------------------------------------------------------------------------------------------------------------------------------------------------------------------------------------------------------------------------------------------------------------------------------------------------------------------------------------------------------------------------------------------------------------------------------------------|

|                                                                                                                                                                                                     |                                                                                                                                                                                                                                                                                                                                                                                                                                                                                                                                                                                                                                                                                              |
|-----------------------------------------------------------------------------------------------------------------------------------------------------------------------------------------------------|----------------------------------------------------------------------------------------------------------------------------------------------------------------------------------------------------------------------------------------------------------------------------------------------------------------------------------------------------------------------------------------------------------------------------------------------------------------------------------------------------------------------------------------------------------------------------------------------------------------------------------------------------------------------------------------------|
| <p>SCI GUIDELINE<br/> <b>IMPLEMENTATION</b><br/> <b>GOAL:</b><br/> <i>Implement and evaluate the use of two new SCI clinical practice guidelines about deep vein thrombosis and bowel care.</i></p> | <ul style="list-style-type: none"> <li>o Local opinion leaders (aka ‘clinical champions’; site coordinators).</li> <li>o Educational sessions:           <ul style="list-style-type: none"> <li>• Ongoing educational in-services, and</li> <li>• Per focus groups that also served to facilitate engagement/buy-in.</li> </ul> </li> <li>o Patient-mediated interventions, per mailed informational and educational brochures.</li> <li>o Standardized documentation templates/standing orders (as prompts and reminder).</li> <li>o Social marketing/outreach visits via a centralized clinical champion/expert.</li> <li>o Policy change regarding retention of documentation.</li> </ul> |
|-----------------------------------------------------------------------------------------------------------------------------------------------------------------------------------------------------|----------------------------------------------------------------------------------------------------------------------------------------------------------------------------------------------------------------------------------------------------------------------------------------------------------------------------------------------------------------------------------------------------------------------------------------------------------------------------------------------------------------------------------------------------------------------------------------------------------------------------------------------------------------------------------------------|
